# Supplementary material
Source: publisher figshare collection journal article supplement (https://acs.figshare.com/ndownloader/files/24031233)
Supplement: Supplementary file 1 [file 24031233]

# Development of a sensitive immunochromatographic method using lanthanide fluorescent microsphere for rapid serodiagnosis of COVID-19

Meng Feng<sup>a,§</sup>, Jun Chen<sup>b,§</sup>, Jingna Xun<sup>b</sup>, Ruixue Dai<sup>c</sup>, Wang Zhao<sup>c</sup>, Hongzhou Lu<sup>b</sup>, Jin Xu<sup>d</sup>, Li Chen<sup>a</sup>, Guodong Sui<sup>c,\*</sup>, and Xunjia Cheng<sup>a,\*</sup>

a Department of Medical Microbiology and Parasitology, School of Basic Medical Sciences, Fudan University, Shanghai 200032, China

b Department of Infectious Diseases and Immunology, Shanghai Public Health Clinical Center, Shanghai 201508, China

c Department of Environmental Science and Engineering, Fudan University, Shanghai 200438, China

d Division of Infection, Children's Hospital of Fudan University, Shanghai 201103, China

## Materials

The polystyrene lanthanide Eu(III) fluorescent microspheres were purchased from Thermo Fisher Scientific Co.,Ltd (USA). N-hydroxysulfosuccinimide and N-(3-dimethylaminopropyl)-N-ethylcarbodiimide were purchased from Pierce Chemical Co. (USA). Anti-human-IgM, anti-human-IgG, chicken IgY and anti-chicken-IgY were purchased from Abcam Co. (UK). *EcoRI* restriction endonuclease and  $\lambda$ Hind III DNA ladder were purchased from TAKARA Co.,Ltd (Japan). Pre-stained protein marker was purchased from Tanon Co. (China). HRP conjugated goat anti human IgG was purchased from Cappel Co. (USA).

**Supporting Figure:**

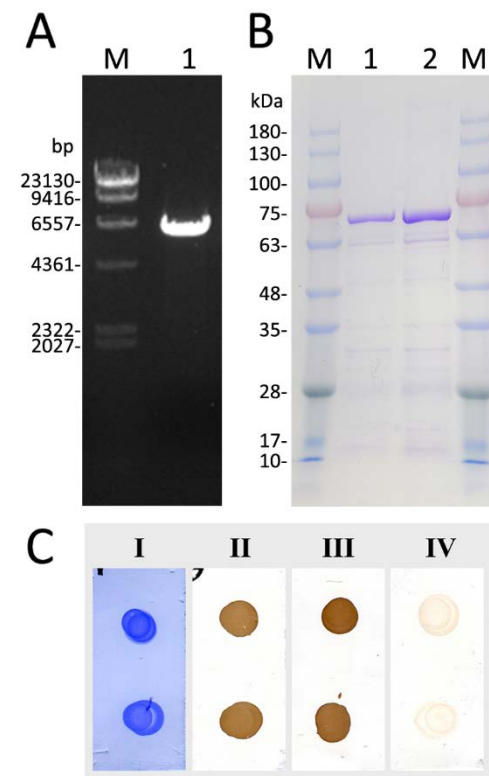

**Figure S1.** Purification and immune response of recombinant NP. (A) pGEX-2T-NP plasmid was digested by *EcoRI* restriction endonuclease and subject to agarose gel electrophoresis. M:  $\lambda$ Hind III DNA ladder; lane 1: digested pGEX-2T-NP plasmid. (B) Recombinant NP with GST tag were prokaryotically expressed, purified and subject to SDS-PAGE. M: Pre-stained protein marker; lane 1: purified soluble NP; lane 2: refolded inclusion body of NP. (C) Dot-blot of recombinant NP reacted with patients' serum. Upper dot was purified soluble NP and below dot was refolded inclusion body of NP. Lane I: Coomassie brilliant blue (CBB) staining; lane II: use SARS-CoV patient's sera as 1<sup>st</sup> antibody; lane III: use SARS-CoV2 patient's sera as 1<sup>st</sup> antibody; lane IV: use healthy person's sera as 1<sup>st</sup> antibody. The serum were 1 : 400 diluted with PBS and HRP conjugated goat anti human IgG were used as 2<sup>nd</sup> antibody.
